# Supplementary material for: Defining basic rules for hardening influenza A virus liquid condensates
Source: eLife. 2023 Apr 4;12:e85182. doi: 10.7554/eLife.85182 (PMC10154025; doi:10.7554/eLife.85182)
Supplement: Supplementary file 1. — (Sheet 1): Topology, thermodynamics, and material properties of influenza A virus (IAV) inclusions. After PR8 infection (1 MOI), cells were subjected to thermal changes. (Sheets 2–3): Topology, thermodynamics, and material properties of IAV inclusions. After PR8 infection (1 MOI) inclusions were analysed at different hours post-infection (hpi) as viral ribonucleoprotein (vRNP) concentration increases (Sheet 2) or with overexpressed Rab11 (Sheet 3). (Sheet 4): Topology, thermodynamics, and material properties of IAV inclusions. After PR8 infection (1 MOI) inclusions were subjected to nucleozin or dimethyl sulfoxide (DMSO) treatment in WT or the mutant virus NP-Y289H. (Sheet 5): Topology, thermodynamics, and material properties of IAV inclusions. After PR8 infection (1 MOI) inclusions were analysed upon FLAPh in native and overexpressing conditions of Rab11. (Sheets 6–8, 11)1: Topology, thermodynamics, and material properties of IAV inclusions. After PR8 infection (1 MOI) inclusions were subjected to live imaging for inclusion tracking (Sheet 6), fusion dynamics (Sheet 7), and FLAPh (Sheet 8). Assessment of the biophysical traits of inclusions upon DMSO or nucleozin treatment subjected to hexanediol and hypotonic shock treatments is shown in (Sheet 11). (Sheets 9–10): Topology, thermodynamics, and material properties of IAV inclusions. Mice was infected with X31 and treated with PBS or nucleozin for the analysis of number of inclusion and topology in lung slices (Sheet 9) and body weight (Sheet 10). [file elife-85182-supp1.xlsx]

## Sheet: Sheet1
Change in Temperature
TreatNames	cell_number	n	dens	S	S_nominal	G	K2	C_dense	Amount_dense	C_dil	Amount_dil	K	total_C_dil	C_total	C_cell	C_nucleus	cell_nuc_ratio	cyt_nuc_ratio	sd_n	sd_dens	sd_S	sd_S_nominal	sd_G	sd_K2	sd_C_dense	sd_Amount_dense	sd_C_dil	sd_Amount_dil	sd_K	sd_total_C_dil	sd_C_total	sd_C_cell	sd_C_nucleus	sd_cell_nuc_ratio	sd_cyt_nuc_ratio
4C	15	237.2	0.127519	0.258597	0.375094	-2415.56	2.85447	3552.32	799.223	1960.44	1842.33	1.81044	1295.22	1455.25	1490.41	2414.35	0.650246	0.559128	139.23	0.0352622	0.193961	0.194059	272.746	0.311802	756.333	246.551	489.258	493.892	0.153931	251.912	277.43	305.956	743.369	0.172016	0.161542
37C	20	361.5	0.225953	0.309332	0.412548	-2167.28	2.31846	3115.96	631.683	1860.14	1669.4	1.64638	1362.63	1510.81	1579.25	2392.92	0.669663	0.581805	203.349	0.0540625	0.195329	0.189601	236.207	0.209175	509.079	169.432	388.542	393.506	0.129031	280.687	306.243	316.189	535.838	0.108647	0.103524
42C	16	406.5	0.272639	0.175349	0.253057	-1477.9	1.7584	2144.46	444.29	1301.04	1156.82	1.54387	1191.77	1288.18	1423.24	2008.45	0.647448	0.562497	157.763	0.0427209	0.248863	0.243902	228.442	0.167433	511.246	111.046	401.106	359.333	0.107108	313.796	330.561	336.933	639.241	0.149285	0.148317
TreatNames	Area	AR	Circ.	Round	sd_Area	sd_AR	sd_Circ.	sd_Round
4C	0.347433	1.3462	0.940547	0.777565	0.0526579	0.0404989	0.0113472	0.0181359
37C	0.312048	1.43784	0.912617	0.740941	0.0329772	0.042607	0.0159656	0.0194464
42C	0.289565	1.46023	0.909186	0.736137	0.0240045	0.0461416	0.0134035	0.0174854
Csat =	minimal Cdil observed in cells that start having viral inclusions
min_C_dil
802.827
LEGEND OF DATA
DATA IN THE MANUSCRIPT
PARAMETER ABOVE	DEFINITION	FORMULA
cell_number	Number of cells
n	number of inclusions per cell	calculated in R from imageJ segmentation
dens	number of inclusions per the area of cytosol	Calculated in R - codes available in 10.5281/zenodo.6901207
S	supersaturation	ln(Cdil/Csat)
G	Gibbs free energy	G=-RTlnK
GG	Fold change in Gibbs free energy	K=Cdense/Cdilute
K2	partition coefficient	Cdense individual inclusions/Cdilute per cell
C_dense	Concentration of vRNPs in inclusion	Mean Fluorescence Intensity (MFI) of cytosolic vRNPs in inclusions
total_C_dil = Cdilute	Concentration of cytosolic vRNPs outside inclusions	MFI outside inclusions
C_cytoplasm	Concentration of cytosolic vRNPs in and ouside inclusions	MFI of whole cytosol
C_cell	Concentration of cellular vRNPs	MFI of whole cell
C_nucleus	Concentration of nuclear vRNPs	MFI of nucleus only
cyt_nuc_ratio	Fraction of cytosolic vRNPs	Ratio of MFI of cytosolic versus nuclear vRNPs
Area	Area in each inclusion (um^2)	ImageJ plugin
AR	Aspect ratio	ImageJ plugin
Circ.	Circularity	ImageJ plugin
Round	Roundness	ImageJ plugin
Csaturation (Csat)	Threshold concentration after which demixing occurs	minimal Cdil observed in cells that start having viral inclusions
FOR VALIDATION
S_nominal	supersaturation nominal	ln(Ctotal/Csat)
K	partition coefficient adapted from Riback et al, 2020 [15]	Average Cdense per cell/Cdilute per cell

## Sheet: Sheet2
Change in vRNP concentration
TreatNames	cell_number	n	dens	S	S_nominal	G	GG	K2	C_dense	Amount_dense	C_dil	Amount_dil	K	total_C_dil	C_total	C_cell	C_nucleus	cell_nuc_ratio	TreatNames.1	sd_n	sd_dens	sd_S	sd_S_nominal	sd_G	sd_GG	sd_K2	sd_C_dense	sd_Amount_dense	sd_C_dil	sd_Amount_dil	sd_K	sd_total_C_dil	sd_C_total	sd_C_cell	sd_C_nucleus	sd_cell_nuc_ratio	sd_cyt_nuc_ratio
3hpi	17	0	0	-2.56969	-2.53849	-1439.5	0	1.74809	448.397	138.087	339.481	383.195	1.30968	255.075	263.161	418.167	1541.58	0.264518	3hpi	33.1044	0.0219205	0.243114	0.238952	503.457	503.457	0.331729	108.331	151.234	103.513	153.634	0.20812	64.8715	64.4776	126.873	581.923	0.0764166	0.0491573
4hpi	17	0	0	-2.56202	-2.50172	-1897.24	-457.736	2.08783	478.488	127.266	283.074	361.515	1.31163	257.04	273.017	918.041	4642.22	0.185106	4hpi	47.1422	0.0272222	0.237099	0.225372	893.222	893.222	0.659582	164.131	267.158	121.705	184.451	0.267683	61.7907	60.9633	387.316	3143.24	0.0603437	0.025816
6hpi	14	191.214	0.100205	0.701845	0.729924	-3239.15	-1799.64	3.51499	23566.3	2321.35	12439.8	8663.51	1.9676	6721.7	6914	7877.76	15071.7	0.546209	6hpi	178.136	0.16856	0.365399	0.376946	623.071	623.071	0.802027	5940.88	750.952	3226.89	2477.25	0.185726	2463.5	2825.61	2788.64	3943.98	0.133488	0.129982
8hpi	18	230.556	0.143201	1.46703	1.53956	-2579.26	-1139.75	2.72033	39680.9	5591.44	21933.9	17109.7	1.72656	14447.8	15534.4	15487.1	17209.7	0.895444	8hpi	193.735	0.114219	0.290032	0.26957	382.171	382.171	0.413343	12407.1	2228.27	7981.38	6376.29	0.156405	3731.3	3855.48	4006.27	4843.68	0.130774	0.149428
12hpi	14	114.5	0.0674981	1.41314	1.44515	-2570.74	-1131.23	2.71642	34718.9	5576.55	20759.8	17687.7	1.66368	13692.6	14138	13777.4	11774	1.0686	12hpi	101.952	0.0635094	0.336684	0.33515	444.091	444.091	0.485122	13066.9	1886.24	8184.11	6475	0.0845214	3826.05	4083.32	4027.25	4095	0.133585	0.159481
16hpi	18	143	0.109157	1.31373	1.33735	-2273.28	-833.77	2.41579	28094.9	4928.8	17225.8	14215.9	1.67084	12394.3	12690.4	12589.3	13626.1	0.963866	16hpi	97.7993	0.0731039	0.250628	0.246173	342.4	342.4	0.342936	6657.48	1677.39	4472.88	4029.34	0.117659	2860.94	2976.01	2964.67	3598.55	0.165506	0.194719
TreatNames	Area	AR	Circ.	Round	sd_Area	sd_AR	sd_Circ.	sd_Round
6hpi	0.171795	1.44758	0.897342	0.729554	0.0455314	0.0673592	0.0341134	0.0252874
8hpi	0.23835	1.50693	0.867687	0.701516	0.0927867	0.0512779	0.0254096	0.0192859
12hpi	0.248236	1.55451	0.854865	0.683931	0.0607671	0.158892	0.031793	0.0543004
16hpi	0.288792	1.52405	0.850278	0.692772	0.0619092	0.0522315	0.0252038	0.019477
Csat =	minimal Cdil observed in cells that start having viral inclusions
min_C_dil
3331.74
DATA IN THE MANUSCRIPT
PARAMETER ABOVE	DEFINITION	FORMULA
cell_number	Number of cells
n	number of inclusions per cell	calculated in R from imageJ segmentation
dens	number of inclusions per the area of cytosol	Calculated in R - codes available in 10.5281/zenodo.6901207
S	supersaturation	ln(Cdil/Csat)
G	Gibbs free energy	G=-RTlnK
GG	Fold change in Gibbs free energy	K=Cdense/Cdilute
K2	partition coefficient	Cdense individual inclusions/Cdilute per cell
C_dense	Concentration of vRNPs in inclusion	Mean Fluorescence Intensity (MFI) of cytosolic vRNPs in inclusions
total_C_dil = Cdilute	Concentration of cytosolic vRNPs outside inclusions	MFI outside inclusions
C_cytoplasm	Concentration of cytosolic vRNPs in and ouside inclusions	MFI of whole cytosol
C_cell	Concentration of cellular vRNPs	MFI of whole cell
C_nucleus	Concentration of nuclear vRNPs	MFI of nucleus only
cyt_nuc_ratio	Fraction of cytosolic vRNPs	Ratio of MFI of cytosolic versus nuclear vRNPs
Area	Area in each inclusion (um^2)	ImageJ plugin
AR	Aspect ratio	ImageJ plugin
Circ.	Circularity	ImageJ plugin
Round	Roundness	ImageJ plugin
Csaturation (Csat)	Threshold concentration after which demixing occurs	minimal Cdil observed in cells that start having viral inclusions
FOR VALIDATION
S_nominal	supersaturation nominal	ln(Ctotal/Csat)
K	partition coefficient adapted from Riback et al, 2020 [15]	Average Cdense per cell/Cdilute per cell

## Sheet: Sheet3
Change in Rab11a concentration
TreatNames	cell_number	n	dens	S	S_nominal	G	GG	K2	C_dense	Amount_dense	C_dil	Amount_dil	K	total_C_dil	C_total	C_cell	C_nucleus	cell_nuc_ratio	TreatNames.1	sd_n	sd_dens	sd_S	sd_S_nominal	sd_G	sd_GG	sd_K2	sd_C_dense	sd_Amount_dense	sd_C_dil	sd_Amount_dil	sd_K	sd_total_C_dil	sd_C_total	sd_C_cell	sd_C_nucleus	sd_cell_nuc_ratio	sd_cyt_nuc_ratio
3hpi	19	0	0	-2.56257	-2.55311	-1352.18	0	1.68986	497.674	119.672	343.477	442.748	1.34073	325.122	328.213	514.66	1379.51	0.388929	3hpi	0	0	0.299055	0.307199	450.292	450.292	0.334496	220.649	122.882	196.518	207.972	0.140053	96.6285	103.35	386.47	474.224	0.1272	0.0416392
4hpi	21	0	0	-2.66641	-2.6305	-1349.86	2.32872	1.68833	473.791	85.489	420.065	405.343	1.22203	293.055	303.771	1039.21	3996.62	0.273675	4hpi	0	0	0.277088	0.288542	906.263	906.263	0.821907	275.94	79.0757	170.239	173.805	0.15395	86.9829	96.5524	665.335	2952.6	0.207316	0.0374667
6hpi	21	567	0.612953	0.802562	1.06718	-2294.21	-942.023	2.43548	22463.3	4277.81	10606.2	9725.17	2.14641	9408.18	12258.3	13234.6	23960.4	0.580405	6hpi	282.574	0.0749086	0.397888	0.391423	219.707	219.707	0.217254	8895.43	1696.57	4378.56	3840.51	0.147522	3573.66	4517.7	4930.65	6193.2	0.116714	0.0970594
8hpi	21	414	0.466256	1.20337	1.51288	-2689.91	-1337.72	2.83964	43268.3	8736.02	18319.3	16708.8	2.28056	14046.8	19142.2	20967.9	30850.6	0.728083	8hpi	233.419	0.104982	0.348683	0.364108	331.295	331.295	0.380106	13364.7	4355.19	6433.66	7028.29	0.200587	4576.96	6252.14	6658.4	7393.33	0.145276	0.119331
12hpi	25	415	0.403216	1.11517	1.3802	-2497.53	-1145.34	2.63539	34841	7764.23	17638.7	16305.6	1.96721	12860.8	16763.8	17333.2	20679.5	0.880925	12hpi	161.269	0.339254	0.271196	0.251847	442.844	442.844	0.471088	8390.39	2378.04	4698.2	4734.18	0.235055	3694.82	4559.43	5036.89	6286.88	0.151079	0.13172
16hpi	21	308	0.353104	1.43745	1.69098	-2247.5	-895.32	2.39175	43329.5	10808.8	23423.5	22573.6	1.82334	17751.4	22873.8	22223.7	24185.6	0.936277	16hpi	166.382	0.0671156	0.253155	0.235544	394.546	394.546	0.398285	5811.31	2441.47	4367.58	4730.33	0.165896	4268	4977.51	4598.18	4442.98	0.178494	0.181476
TreatNames	Area	AR	Circ.	Round	sd_Area	sd_AR	sd_Circ.	sd_Round
6hpi	0.243208	1.51534	0.841103	0.695821	0.0319615	0.0402882	0.0215877	0.0163831
8hpi	0.303745	1.49179	0.844857	0.705274	0.0515827	0.0434646	0.019122	0.0178464
12hpi	0.358037	1.51479	0.828986	0.694403	0.0464213	0.0526541	0.0234228	0.0217472
16hpi	0.385278	1.51001	0.82617	0.697649	0.0426379	0.0504259	0.0190109	0.0192262
Csat =	minimal Cdil observed in cells that start having viral inclusions
min_C_dil
4216.55
DATA IN THE MANUSCRIPT
PARAMETER ABOVE	DEFINITION	FORMULA
cell_number	Number of cells
n	number of inclusions per cell	calculated in R from imageJ segmentation
dens	number of inclusions per the area of cytosol	Calculated in R - codes available in 10.5281/zenodo.6901207
S	supersaturation	ln(Cdil/Csat)
G	Gibbs free energy	G=-RTlnK
GG	Fold change in Gibbs free energy	K=Cdense/Cdilute
K2	partition coefficient	Cdense individual inclusions/Cdilute per cell
C_dense	Concentration of vRNPs in inclusion	Mean Fluorescence Intensity (MFI) of cytosolic vRNPs in inclusions
total_C_dil = Cdilute	Concentration of cytosolic vRNPs outside inclusions	MFI outside inclusions
C_cytoplasm	Concentration of cytosolic vRNPs in and ouside inclusions	MFI of whole cytosol
C_cell	Concentration of cellular vRNPs	MFI of whole cell
C_nucleus	Concentration of nuclear vRNPs	MFI of nucleus only
cyt_nuc_ratio	Fraction of cytosolic vRNPs	Ratio of MFI of cytosolic versus nuclear vRNPs
Area	Area in each inclusion (um^2)	ImageJ plugin
AR	Aspect ratio	ImageJ plugin
Circ.	Circularity	ImageJ plugin
Round	Roundness	ImageJ plugin
Csaturation (Csat)	Threshold concentration after which demixing occurs	minimal Cdil observed in cells that start having viral inclusions
FOR VALIDATION
S_nominal	supersaturation nominal	ln(Ctotal/Csat)
K	partition coefficient adapted from Riback et al, 2020 [15]	Average Cdense per cell/Cdilute per cell

## Sheet: Sheet4
Variation of strength and number of interactions between vRNPs with or without nucleozin
TreatNames	cell_number	n	dens	S	S_nominal	G	GG	K2	C_dense	Amount_dense	C_dil	Amount_dil	K	total_C_dil	C_total	C_cell	C_nucleus	cell_nuc_ratio	cyt_nuc_ratio	sd_n	sd_dens	sd_S	sd_S_nominal	sd_G	sd_GG	sd_K2	sd_C_dense	sd_Amount_dense	sd_C_dil	sd_Amount_dil	sd_K	sd_total_C_dil	sd_C_total	sd_C_cell	sd_C_nucleus	sd_cell_nuc_ratio	sd_cyt_nuc_ratio
3hpi	20	0	0	-3.16653	-3.13415	-923.757	0	1.43112	29.7511	3.41591	16.8801	12.2093	0.909103	19.7009	20.3518	43.6274	155.204	0.282152	0.119611	0	0	0.286755	0.291281	405.539	405.539	0.262403	7.71001	1.27122	6.57472	5.0562	0.0738046	5.91258	6.36182	11.6034	40.448	0.0459324	0.0341036
8hpi	20	310.5	0.271465	0.442646	0.624849	-2634.83	-1711.07	2.77977	2091.66	397.808	965.013	829.818	1.97715	728.124	873.359	973.119	2030.8	0.527974	0.389262	133.651	0.087393	0.27092	0.286909	396.557	396.557	0.438911	417.65	130.056	233.653	232.082	0.174146	213.031	265.454	294.021	527.693	0.130001	0.105692
Ncz 5min	20	235	0.199011	0.0287023	0.276922	-3793.92	-2870.16	4.362	1946.9	534.845	682.509	644.961	2.62796	480.992	616.53	714.455	1540.77	0.443765	0.279383	104.724	0.0747158	0.324932	0.325563	724.782	724.782	1.27524	443.077	202.148	213.119	221.419	0.34947	155.182	198.965	232.062	442.506	0.105937	0.0905326
Ncz 20min	20	150.5	0.130054	-0.367319	0.0199108	-4879.76	-3956	6.646	2349.44	857.61	762.571	832.356	2.98393	324.196	476.97	610.518	1720.9	0.362581	0.186265	65.6758	0.0461304	0.257608	0.271528	663.357	663.357	1.80073	449.186	307.84	159.719	214.713	0.238884	97.199	147.071	142.161	467.404	0.146596	0.105034
Ncz 30min	20	114	0.112345	-0.455137	-0.0176206	-5391.67	-4467.91	8.10111	2555.37	1068.63	729.541	847.972	3.10959	296.511	459.258	562.219	1281.09	0.434564	0.218621	81.1726	0.0595012	0.297176	0.283316	820.833	820.833	2.45821	454.133	415.728	141.341	200.343	0.271696	113.496	163.494	169.179	348.855	0.126645	0.098434
Ncz 45min	20	88.5	0.091804	-0.329739	0.144924	-5469.3	-4545.54	8.35003	3094.11	1553.88	884.2	1024.46	3.28326	336.104	540.371	666.571	1497.89	0.481191	0.247567	49.0406	0.0345693	0.283219	0.291961	719.7	719.7	2.87912	391.781	416.848	135.163	215.919	0.222028	90.8752	146.505	145.937	299.629	0.109846	0.0650462
Ncz 1h	21	66	0.0648113	-0.269652	0.127812	-5736.93	-4813.17	9.2619	2956.59	1925.9	994.53	1283.44	2.75717	356.91	531.099	658.629	1375.06	0.419739	0.212039	54.1207	0.037701	0.293877	0.285307	674.783	674.783	2.12314	558.713	467.901	263.3	352.332	0.257904	116.752	165.679	197.298	503.873	0.0799861	0.0590388
Ncz 2h	20	38	0.0368725	-0.448011	0.0788818	-6312.2	-5388.44	11.5784	3569.44	3025.89	1256.83	1854.16	2.72008	298.612	505.755	759.067	1890.74	0.37107	0.162763	33.9942	0.0282775	0.302308	0.301931	808.491	808.491	4.00363	640.028	871.089	364.435	639.432	0.382686	93.9735	155.05	194.244	530.363	0.0783233	0.0492226
TreatNames	Area	AR	Circ.	Round	sd_Area	sd_AR	sd_Circ.	sd_Round
8hpi	0.284754	1.429	0.893592	0.733958	0.0448222	0.0316277	0.0161513	0.0148855
Ncz 5min	0.353712	1.52466	0.860948	0.693355	0.0689109	0.0557572	0.0263293	0.0208709
Ncz 20min	0.471039	1.58736	0.819002	0.665916	0.0781601	0.0328931	0.0212714	0.0114397
Ncz 30min	0.569003	1.58462	0.800483	0.669231	0.118939	0.0372528	0.017945	0.0143089
Ncz 45min	0.681484	1.57811	0.786796	0.668977	0.111607	0.0477723	0.0171011	0.015642
Ncz 1h	0.77935	1.5785	0.771872	0.668074	0.144169	0.0536541	0.020551	0.0196458
Ncz 2h	1.02439	1.56232	0.761165	0.671933	0.180383	0.0647746	0.0216716	0.0226333
Csat =	minimal Cdil observed in cells that start having viral inclusions
min_C_dil
467.377
Variation of strength and number of interactions between PR8 (NP -WT) and mutant PR8 (NP-Y289H) vRNPs treated with nucleozin
TreatNames	cell_number	n	Area	sd_Area	GG	sd_n	sd_GG
3hpi	20	0	NA		-89.0023	0	-89.0023
4hpi	20	0	NA		-40.824	0	-52.848
PR8_NP-WT_DMSO	22	467.955	0.257243	0.042089	-1247.53	182.358	-1247.53
PR8_NP-WT_Ncz	27	58.8148	0.810776	0.214673	-5433.99	33.0152	-5433.99
PR8_NP-Y289H_DMSO	17	303.353	0.275356	0.0434083	-1015.42	99.4026	-1015.42
PR8_NP-Y289H_Ncz	19	416.947	0.268678	0.0407763	-1077.57	182.459	-1077.57
DATA IN THE MANUSCRIPT
PARAMETER ABOVE	DEFINITION	FORMULA
cell_number	Number of cells
n	number of inclusions per cell	calculated in R from imageJ segmentation
dens	number of inclusions per the area of cytosol	Calculated in R - codes available in 10.5281/zenodo.6901207
S	supersaturation	ln(Cdil/Csat)
G	Gibbs free energy	G=-RTlnK
GG	Fold change in Gibbs free energy	K=Cdense/Cdilute
K2	partition coefficient	Cdense individual inclusions/Cdilute per cell
C_dense	Concentration of vRNPs in inclusion	Mean Fluorescence Intensity (MFI) of cytosolic vRNPs in inclusions
total_C_dil = Cdilute	Concentration of cytosolic vRNPs outside inclusions	MFI outside inclusions
C_cytoplasm	Concentration of cytosolic vRNPs in and ouside inclusions	MFI of whole cytosol
C_cell	Concentration of cellular vRNPs	MFI of whole cell
C_nucleus	Concentration of nuclear vRNPs	MFI of nucleus only
cyt_nuc_ratio	Fraction of cytosolic vRNPs	Ratio of MFI of cytosolic versus nuclear vRNPs
Area	Area in each inclusion (um^2)	ImageJ plugin
AR	Aspect ratio	ImageJ plugin
Circ.	Circularity	ImageJ plugin
Round	Roundness	ImageJ plugin
Csaturation (Csat)	Threshold concentration after which demixing occurs	minimal Cdil observed in cells that start having viral inclusions
FOR VALIDATION
S_nominal	supersaturation nominal	ln(Ctotal/Csat)
K	partition coefficient adapted from Riback et al, 2020 [15]	Average Cdense per cell/Cdilute per cell

## Sheet: Sheet5
Inclusion fluorescence loss after photoactivation (FLAPh) in endogenous and overexpressed Rab11a
Treatment	n	mean_k	mean_a	mean_t_half	sd_k	sd_a	sd_t_half	sem_k	sem_a	sem_t_half
GFP	10	0.0640704	0.663442	14.4883	0.0447934	0.0878862	6.88087	0.0141649	0.027792	2.17592
GFP-Rab11a-WT	10	0.0175864	0.651759	52.1459	0.00980527	0.26712	30.3588	0.0031007	0.0844707	9.60029
DATA IN THE MANUSCRIPT
PARAMETER ABOVE	DEFINITION	FORMULA
t_half	Half life	t_half = In(2)/k
k	Rate constant
a	Mobile fraction
Model fitting	Single exponential	y = a*exp(-k*Time) + (1-a)

## Sheet: Sheet6
tracking viral inclusions in the presence and absence of nucleozin
treatment	mean_msd	median_msd	sd_msd	sem_msd	n
DMSO	1.2516	0.838197	1.16387	0.000771	13
Ncz	0.124302	0.0565523	0.221543	6.48e-05	27
msd =	means square displacement

## Sheet: Sheet7
Fusion Time of inclusions in the presence and absence of nucleozin
ID	n	mean	median	sd	sem
DMSO	10	5.8	3.5	6.12463	1.93678
Ncz	29	85.4483	99	45.0496	8.36551

## Sheet: Sheet8
Inclusion fluorescence loss after photoactivation (FLAPh) in the presence and absence of nucleozin
Treatment	n	mean_k	mean_a	mean_t_half	median_k	median_a	median_t_half	sd_k	sd_a	sd_t_half	sem_k	sem_a	sem_t_half
GFP_DMSO	17	0.0505282	0.795225	14.4051	0.0528159	0.778011	13.1238	0.0108571	0.10192	3.52677	0.00263323	0.0247191	0.855366
GFP_Ncz	16	0.0145341	0.528108	85.0188	0.0140332	0.46799	49.3941	0.00912871	0.217183	79.383	0.00228218	0.0542958	19.8458
DATA IN THE MANUSCRIPT
PARAMETER ABOVE	DEFINITION	FORMULA
t_half	Half life	t_half = In(2)/k
k	Rate constant
a	Mobile fraction
Model fitting	Single exponential	y = a*exp(-k*Time) + (1-a)

## Sheet: Sheet9
Topology of inclusions in mice lungs
TreatNames	Area	AR	Circ	Round	sd_Area	sd_AR	sd_Circ	sd_Round
PBS 30min	0.102675	2.95159	0.135378	0.513006	0.0296685	0.428478	0.0127126	0.02182
PBS 1h	0.0948193	2.5493	0.141796	0.538316	0.0318037	0.253013	0.0110243	0.0153851
PBS 2h	0.101635	2.30903	0.140258	0.548686	0.0192202	0.298156	0.020066	0.0297791
NCZ 30min	0.193294	2.33697	0.127521	0.541417	0.0646579	0.385733	0.00761807	0.0327833
NCZ 1h	0.185792	2.29434	0.143318	0.557862	0.0622086	0.358927	0.0239833	0.0311019
NCZ 2h	0.225552	2.59141	0.127524	0.529704	0.0512419	0.604224	0.012568	0.0530834
TreatNames	n_cells	n_inclusions	inclusion_per_cell
PBS 30min	1694	215846	127.418
PBS 1h	446	44106	98.8924
PBS 2h	1401	316881	226.182
NCZ 30min	2014	382854	190.096
NCZ 1h	1543	151171	97.9721
NCZ 2h	1301	141693	108.911
LEGEND OF DATA
DATA IN THE MANUSCRIPT
PARAMETER ABOVE	DEFINITION	FORMULA
Area	Area in each inclusion (um^2)	ImageJ plugin
AR	Aspect ratio	ImageJ plugin
Circ.	Circularity	ImageJ plugin
Round	Roundness	ImageJ plugin
n_cells	number of cells	calculated in R from imageJ segmentation
n_inclusions	total number of inclusions	calculated in R from imageJ segmentation
inclusion_per_cell	number of inclusions per cell	total number of inclusions/number of cells

## Sheet: Sheet10
Body weight of mice
Treatment	Day	Average_weight	SD	n	SEM
Mock i.p. Control	1	0	0	23	0
Mock i.p. Control	2	1.73913	1.97317	23	0.362634
Mock i.p. Control	3	1.93913	2.49923	23	0.404337
Mock i.p. Control	4	2.22174	2.38079	23	0.463265
Mock i.p. Control	5	0.79375	3.23903	16	0.198437
Mock i.p. Control	6	0.8875	3.59794	16	0.221875
Mock i.p. Control	7	1.675	3.29312	16	0.41875
Mock i.p. Control	8	0.36	2.86845	5	0.160997
Mock i.p. Control	9	1.3	3.72626	9	0.433333
Mock i.p. Control	10	1.67778	2.23874	9	0.559259
Mock i.p. Control	11	0.871429	2.13285	7	0.329369
Mock i.p. Control	12	1.3	2.59101	7	0.491354
Mock i.p. NCZ	1	0	0	23	0
Mock i.p. NCZ	2	1.6	3.14628	23	0.333623
Mock i.p. NCZ	3	1.66522	2.996	23	0.347222
Mock i.p. NCZ	4	2.05652	3.10247	23	0.428814
Mock i.p. NCZ	5	0.25	2.89436	16	0.0625
Mock i.p. NCZ	6	-0.546667	3.56809	15	-0.141149
Mock i.p. NCZ	7	1.29333	1.9455	15	0.333937
Mock i.p. NCZ	8	0.72	1.47207	5	0.321994
Mock i.p. NCZ	9	3.14444	1.46553	9	1.04815
Mock i.p. NCZ	10	4.41111	2.40283	9	1.47037
Mock i.p. NCZ	11	3.71429	1.80594	7	1.40387
Mock i.p. NCZ	12	3.45714	2.00238	7	1.30668
X31 i.p. Control	1	0	0	32	0
X31 i.p. Control	2	0.6125	2.69955	32	0.108276
X31 i.p. Control	3	-2.75937	3.06382	32	-0.487793
X31 i.p. Control	4	-7.28125	3.90289	32	-1.28716
X31 i.p. Control	5	-7.44783	3.63829	23	-1.55298
X31 i.p. Control	6	-7.20435	3.71905	23	-1.50221
X31 i.p. Control	7	-9.22174	3.80657	23	-1.92287
X31 i.p. Control	8	-8.02	0.895545	5	-3.58665
X31 i.p. Control	9	-5.45	3.29609	14	-1.45657
X31 i.p. Control	10	-1.74286	2.11104	14	-0.465798
X31 i.p. Control	11	-0.77	1.83367	10	-0.243495
X31 i.p. Control	12	0.1	2.10608	10	0.0316228
X31 i.p. NCZ	1	0	0	33	0
X31 i.p. NCZ	2	0.293939	2.18774	33	0.0511683
X31 i.p. NCZ	3	-1.23636	2.33343	33	-0.215223
X31 i.p. NCZ	4	-6.15313	3.48619	32	-1.08773
X31 i.p. NCZ	5	-5.72727	3.66855	22	-1.22106
X31 i.p. NCZ	6	-6.21818	4.12168	22	-1.32572
X31 i.p. NCZ	7	-5.43182	3.82353	22	-1.15807
X31 i.p. NCZ	8	-5.02	4.3723	5	-2.24501
X31 i.p. NCZ	9	-3.90667	4.10565	15	-1.0087
X31 i.p. NCZ	10	-0.106667	3.52794	15	-0.0275412
X31 i.p. NCZ	11	-0.67	3.36123	10	-0.211873
X31 i.p. NCZ	12	0.47	3.32801	10	0.148627

[truncated: 1 more sheets: Sheet11]
